# Supplementary material for: Physical Activity Modifies the Severity of COVID-19 in Hospitalized Patients—Observational Study
Source: MDPI journal article supplement (doi:10.3390/jcm12124046), 2023-06-14
Supplement: s1 [file s1]

## Supplementary

Figure S1. Flow Diagram.

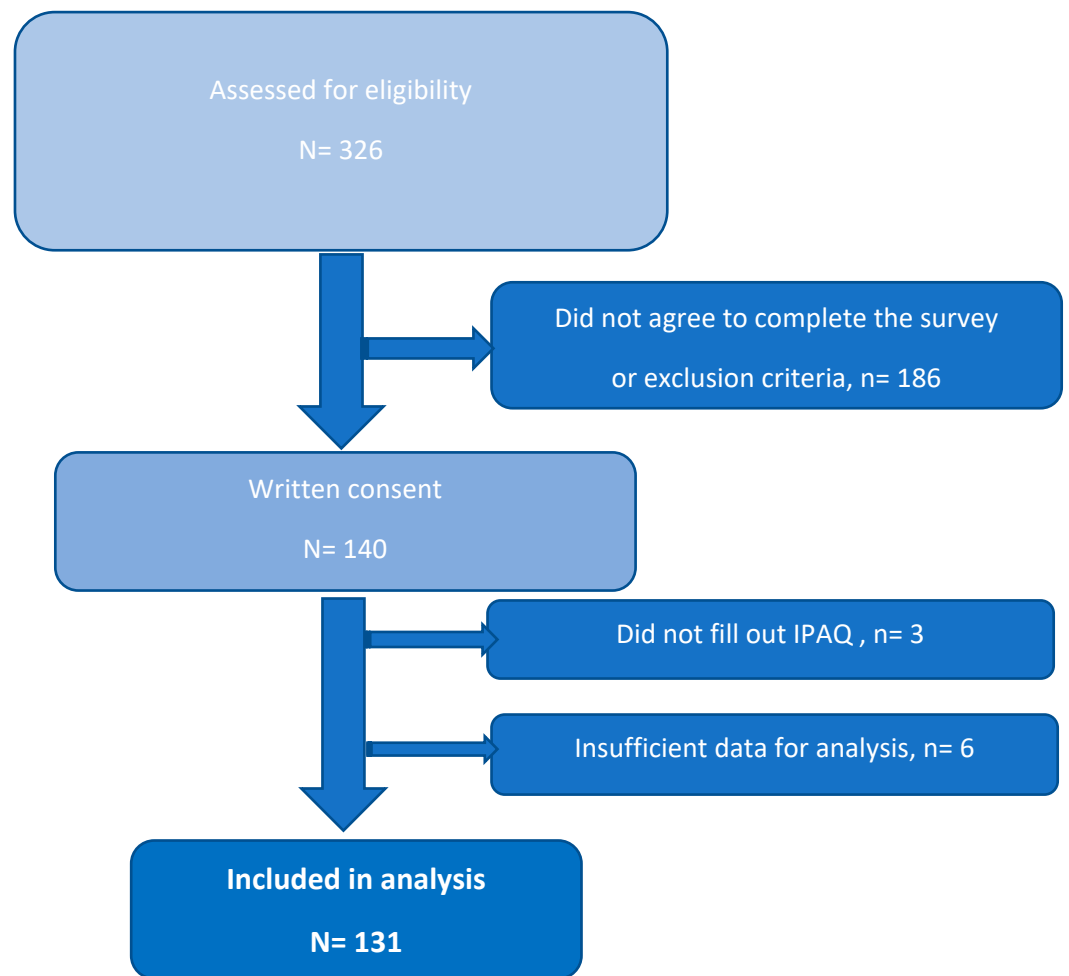

IPAQ—International Physical Activity Questionnaire

**Table S1. Chronic diseases in patients hospitalized due to COVID-19.**

| VARIABLE<br>N=131                       | OCCURRENCE | %     | VARIABLE<br>N=131                                                            | OCCURRENCE | %    |
|-----------------------------------------|------------|-------|------------------------------------------------------------------------------|------------|------|
| CHRONIC CAD                             | 25         | 19.08 | OSTEOARTHRITIS                                                               | 13         | 9.92 |
| HF                                      | 20         | 15.27 | INFLAMMATORY DISEASES OF THE JOINTS                                          | 5          | 3.82 |
| PE                                      | 2          | 1.53  | HISTORY OF LIMB INJURIES*                                                    | 2          | 1.53 |
| DVT                                     | 1          | 0.76  | HISTORY OF CHEST INJURIES**                                                  | 1          | 0.76 |
| ARTERIAL THROMBOSIS                     | 2          | 1.53  | COPD                                                                         | 9          | 6.87 |
| STROKE                                  | 17         | 12.98 | BRONCHIAL ASTHMA                                                             | 7          | 5.34 |
| PAD                                     | 5          | 3.82  | SEASONAL ALLERGY                                                             | 1          | 0.76 |
| ATHEROSCLEROSIS IN A DIFFERENT LOCATION | 21         | 16.03 | OTHER CHRONIC RESPIRATORY SYSTEM DISEASE                                     | 3          | 2.29 |
| DIABETES                                | 31         | 23.66 | PHARMACOLOGICALLY STIMULATED IMMUNOSUPPRESSION FROM OTHER CHRONIC CONDITIONS | 5          | 3.82 |

CAD—coronary artery disease; HF—heart failure; PE—pulmonary embolism; DVT—deep vein thrombosis; ALI—acute limb ischemia; PAD—peripheral artery disease;\* only if affects joint mobility; \*\* only if limiting chest mobility; COPD—chronic obstructive pulmonary disease

**Table S2. Chronic medications used by patients hospitalized due to COVID-19.**

| TYPE OF MEDICATION<br>N=131 | OCCURRENCE | % | TYPE OF MEDICATION<br>N=131 | OCCURRENCE | % |
|-----------------------------|------------|---|-----------------------------|------------|---|
|                             |            |   |                             |            |   |

|                                               |    |       |                                                  |    |       |
|-----------------------------------------------|----|-------|--------------------------------------------------|----|-------|
| IMMUNOSUPPRESSIVE                             | 11 | 8-40  | ANTIARRHYTHMIC                                   | 27 | 20-61 |
| STATINS                                       | 42 | 32-06 | OTHER CARDIAC DRUGS                              | 14 | 10-69 |
| FIBRATES                                      | 3  | 2-29  | RESPIRATORY SYSTEM                               | 14 | 10-69 |
| OTHER DRUGS USED IN LIPID DISORDERS TREATMENT | 3  | 2-29  | DRUGS FOR DISEASES OF THE GASTROINTESTINAL TRACT | 42 | 32-06 |
| ANTIHYPERTENSIVE                              | 83 | 63-36 | NSAIDs                                           | 3  | 2-29  |
| ANTICOAGULANTS                                | 41 | 31-30 | HYPOGLYCEMIC DRUGS                               | 30 | 22-90 |
| ANTIPLATELET                                  | 27 | 20-61 | OTHER DRUGS NOT INCLUDED IN THE EARLIER LIST     | 66 | 50-38 |

NSAIDs—nonsteroidal anti-inflammatory drugs

**Table S3. Laboratory results on admission to the hospital.**

| Variable                 | Valid N | Mean SR | SR-95% CI | SR+95% CI | Median | Min.  | Max.   | SD    |
|--------------------------|---------|---------|-----------|-----------|--------|-------|--------|-------|
| Hb [g/dL]                | 131     | 12.82   | 12.51     | 13.14     | 12.90  | 7.90  | 17.40  | 1.83  |
| RBC [million/ $\mu$ L]   | 131     | 4.25    | 4.15      | 4.35      | 4.26   | 2.66  | 5.41   | 0.59  |
| Ht [%]                   | 131     | 38.41   | 37.57     | 39.25     | 38.30  | 25.10 | 48.20  | 4.86  |
| PLT [thousand/ $\mu$ L]  | 131     | 226.73  | 210.49    | 242.98    | 209.00 | 24.00 | 544.00 | 93.98 |
| WBC [thousand/ $\mu$ L]  | 131     | 6.50    | 5.97      | 7.03      | 6.10   | 0.95  | 17.93  | 3.04  |
| LYMP [thousand/ $\mu$ L] | 119     | 2.12    | 0.45      | 3.78      | 1.19   | 0.20  | 101.00 | 9.16  |

|                           |     |                |                |                |               |               |                  |               |
|---------------------------|-----|----------------|----------------|----------------|---------------|---------------|------------------|---------------|
| [%]                       |     | 23-62          | 21-13          | 26-11          | 21-20         | 2-70          | 101-00           | 13-72         |
| Glucose [mg%]<br>[mmol/L] | 127 | 116-20<br>7-18 | 107-41<br>5-63 | 125-00<br>8-74 | 99-00<br>5-49 | 50-00<br>2-78 | 358-00<br>101-00 | 50-07<br>8-84 |
| Creatinine<br>[mg/dL]     | 131 | 1-04           | 0-97           | 1-12           | 0-96          | 0-54          | 3-69             | 0-42          |
| ALT<br>[U/L]              | 131 | 41-41          | 33-08          | 49-74          | 25-00         | 5-60          | 376-00           | 48-19         |
| AST<br>[U/L]              | 131 | 49-80          | 39-00          | 60-59          | 35-00         | 12-00         | 575-00           | 62-46         |
| LDH<br>[U/L]              | 116 | 283-81         | 261-76         | 305-86         | 246-00        | 93-00         | 750-00           | 119-88        |
| D-dimer<br>[μg/mL]        | 125 | 2-37           | 1-40           | 3-33           | 0-94          | 0-22          | 49-66            | 5-45          |
| PCT<br>[ng/mL]            | 129 | 0-30           | 0-11           | 0-50           | 0-06          | 0-00          | 9-28             | 1-12          |
| CRP<br>[mg/L]             | 131 | 57-71          | 46-29          | 69-13          | 32-88         | 1-03          | 376-92           | 66-08         |
| Albumin<br>[g/dL]         | 86  | 3-49           | 3-39           | 3-59           | 3-50          | 2-30          | 4-70             | 0-46          |
| Ferritin<br>[ng/mL]       | 107 | 751-96         | 579-50         | 924-41         | 500-00        | 11-10         | 5342-00          | 899-77        |
| TnT<br>[pg/mL]            | 55  | 24-04          | 12-67          | 35-41          | 10-80         | 1-90          | 215-80           | 42-05         |
| TCL<br>[mg/dL]            | 56  | 156-16         | 142-97         | 169-35         | 150-50        | 44-00         | 359-00           | 49-25         |
| LDL<br>[mg/dL]            | 56  | 89-32          | 79-73          | 98-91          | 88-50         | 4-00          | 179-00           | 35-82         |
| HDL<br>[mg/dL]            | 56  | 37-50          | 33-59          | 41-41          | 34-50         | 11-00         | 88-00            | 14-62         |
| TG<br>[mg/dL]             | 56  | 158-25         | 105-81         | 210-69         | 124-00        | 43-00         | 1510-00          | 195-82        |

N—the number of individuals with laboratory data available; SD—standard deviation; Hb—hemoglobin; RBC—red blood cells; HT—hematocrit; PLT—platelets; WBC—white blood cells; LYMP—lymphocytes; ALT—alanine aminotransferase; AST—aspartate aminotransferase; LDH—lactate dehydrogenase; PCT—procalcitonin; CRP—C-reactive protein; TnT—troponin T; TCL—total cholesterol level; LDL—low-density lipoprotein; HDL—high-density lipoprotein; TG—triglycerides
